# Supplementary material for: β-lactolin increases cerebral blood flow in dorsolateral prefrontal cortex in healthy adults: a randomized controlled trial
Source: Aging (Albany NY). 2020 Sep 29;12(18):18660–75. doi: 10.18632/aging.103951 (PMC7585116; doi:10.18632/aging.103951)
Supplement: Supplementary Figures [file aging-12-103951-s002..pdf]

SUPPLEMENTARY FIGURES

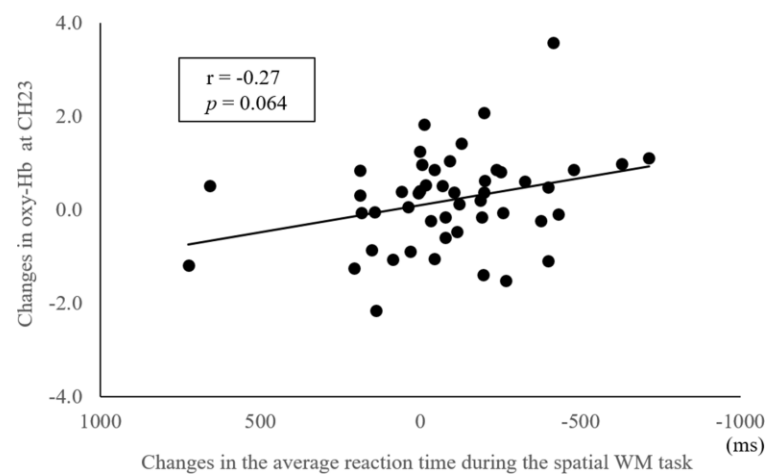

**Supplementary Figure 1. Correlation between task performance and rCBF.** Scatter plot showing correlation between the changes in average reaction time during the spatial working memory task and the changes in oxy-Hb at CH23 during the task.  $r$ : Spearman’s rank correlation coefficient.  $P$ -values were calculated using Spearman’s rank correlation. rCBF, regional cerebral blood flow.

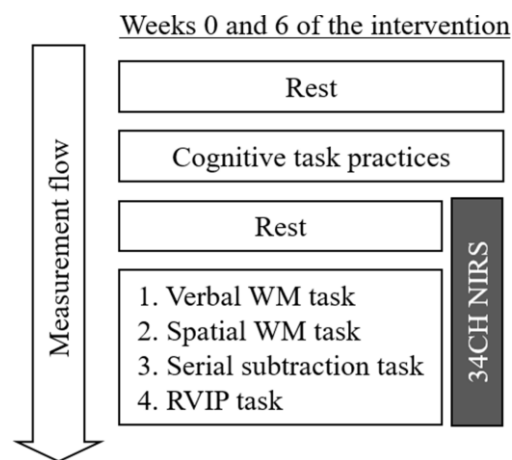

**Supplementary Figure 2. Measurement flow.** rCBF during working memory tasks was measured using a 34CH NIRS. CH, channel; NIRS, near-infrared spectroscopy; rCBF, regional cerebral blood flow; RVIP, rapid visual information processing.

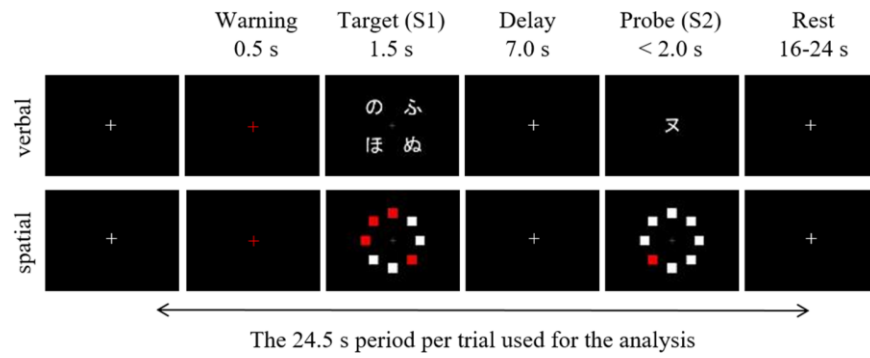

**Supplementary Figure 3. Schematic diagram of the verbal and spatial working memory tasks.** Images for the verbal and spatial working memory tasks are shown. The 24.5-s periods between the arrows were used for the analysis.
