# Supplementary material for: β-lactolin increases cerebral blood flow in dorsolateral prefrontal cortex in healthy adults: a randomized controlled trial
Source: Aging (Albany NY). 2020 Sep 29;12(18):18660–75. doi: 10.18632/aging.103951 (PMC7585116; doi:10.18632/aging.103951)
Supplement: Supplementary Tables [file aging-12-103951-s001..pdf]

## SUPPLEMENTARY TABLES

**Supplementary Table 1. Reaction time in verbal working memory task.**

|                    | Group      | Week 0         | <i>p</i> | Week 6          | <i>p</i> | $\Delta$      | ANOVA <i>p</i> |
|--------------------|------------|----------------|----------|-----------------|----------|---------------|----------------|
| Average            | Placebo    | 1415.9 ± 301.1 | 0.915    | 1408.7 ± 320.8  | 0.488    | -7.3 ± 255.1  | 0.391          |
| reaction time (ms) | β-lactolin | 1426.1 ± 356.5 |          | 1348.7 ± 276.4  |          | -77.4 ± 310.0 |                |
| Shortest           | Placebo    | 1018.4 ± 190.2 | 0.455    | 1007.7 ± 215.3  | 0.69     | -10.7 ± 176.4 | 0.165          |
| reaction time (ms) | β-lactolin | 1060.5 ± 201.0 |          | 982.5 ± 224.6 * |          | -78.0 ± 156.8 |                |

Average and shortest reaction time during the verbal working memory task. Data are presented as means ± SD for the placebo (n = 25) and the β-lactolin groups (n = 24). Group differences were identified using ANOVA. Time differences were identified using paired *t*-tests; \**p* < 0.05. ANOVA, analysis of variance; SD, standard deviation.

**Supplementary Table 2. Reaction time in spatial working memory task.**

|                    | Group      | Week 0         | <i>p</i> | Week 6           | <i>p</i> | $\Delta$       | ANOVA <i>p</i> |
|--------------------|------------|----------------|----------|------------------|----------|----------------|----------------|
| Average            | Placebo    | 1571.0 ± 196.4 | 0.645    | 1507.3 ± 197.3   | 0.244    | -63.7 ± 242.1  | 0.466          |
| reaction time (ms) | β-lactolin | 1539.5 ± 273.7 |          | 1419.7 ± 311.6 † |          | -119.9 ± 291.7 |                |
| Shortest           | Placebo    | 1104.9 ± 213.0 | 0.836    | 1036.8 ± 195.8   | 0.817    | -68.1 ± 196.0  | 0.979          |
| reaction time (ms) | β-lactolin | 1091.7 ± 233.2 |          | 1021.6 ± 259.1   |          | -70.1 ± 323.4  |                |

Average and shortest reaction times during the spatial working memory task. Data are presented as means and ± SD for the placebo (n = 25) and β-lactolin groups (n = 24). Group differences were identified using ANOVA. Time differences were identified using paired *t*-tests; †*p* < 0.1. ANOVA, analysis of variance; SD, standard deviation.
